# Supplementary material
Source: publisher site journal article supplement (https://www.degruyterbrill.com/publication/isbn/9783110298307/downloadAsset/9783110298307_Contents.pdf)
Supplement: Supplementary file 1 [file 9783110298307_Contents.pdf]

# Table of Contents

Preface — V

Contributing authors — VII

## **1 Mesenchymal stem cells in the context of stem cell biology — 1**

- 1.1 Introduction – Definitions — 1
- 1.2 Embryonic and adult tissue stem cells — 2
- 1.3 Adult tissue stem cells and progenitors — 3
- 1.4 Adult stem cells and tissue homeostasis — 5
- 1.5 Adult stem cell niches — 5
- 1.6 Commitment and differentiation — 7
- 1.7 The case for bone marrow MSCs — 8
- 1.8 Clinical prospects — 10
- 1.9 Concluding remark — 11
- References — 11

## **2 Are mesenchymal stem cells immune privileged? — 17**

- 2.1 Introduction – Definition of mesenchymal stem cells (MSCs) — 17
- 2.2 The immunosuppressive effect of MSCs on immune cells — 18
- 2.3 The potential clinical benefits of MSCs as immunosuppressants — 20
- 2.4 The mechanisms of immunosuppression by MSCs — 21
- 2.5 The mechanisms of immunosuppression by human MSCs — 21
- 2.6 Immunosuppression by murine MSCs and the species difference underlying the mechanisms of immunosuppression by MSCs — 25
- 2.7 Immunosuppression mediated by fibroblasts — 28
- 2.8 The mechanisms of the immunosuppressive effect of MSCs are shared with other nonstromal cells — 28
- 2.9 How long can MSCs survive *in vivo*? — 28
- 2.10 Conclusion and discussion — 29
- References — 31

## **3 Mesenchymal stem cell therapies for autoimmune diseases — 37**

- 3.1 Introduction — 37
- 3.2 Autoimmune disease — 39
- 3.3 Mesenchymal stem cells (MSCs) — 41
  - 3.3.1 Animal models — 42
- 3.4 Results of MSCs clinical trials — 44
- 3.5 Safety of MSCs — 45
- 3.6 Conclusion — 45
- References — 46

|          |                                                                                                                                                                       |
|----------|-----------------------------------------------------------------------------------------------------------------------------------------------------------------------|
| <b>4</b> | <b>Mesenchymal stem cells in osteoarthritis and rheumatic disease — 51</b>                                                                                            |
| 4.1      | Introduction – Rheumatic diseases — 51                                                                                                                                |
| 4.2      | Rheumatoid arthritis (RA) — 51                                                                                                                                        |
| 4.3      | Osteoarthritis (OA) — 53                                                                                                                                              |
| 4.4      | MSCs in healthy and rheumatic joint tissues — 55                                                                                                                      |
| 4.5      | Application of MSCs in rheumatic diseases — 56                                                                                                                        |
| 4.6      | MSCs application in animals — 60                                                                                                                                      |
| 4.7      | Clinical studies in humans — 66                                                                                                                                       |
| 4.8      | Risks and benefits of MSCs treatments in rheumatic diseases — 68                                                                                                      |
|          | References — 70                                                                                                                                                       |
| <b>5</b> | <b>Mesenchymal stem cells in enthesis formation and repair — 83</b>                                                                                                   |
| 5.1      | Introduction — 83                                                                                                                                                     |
| 5.2      | Structure of the tendon-to-bone junction — 84                                                                                                                         |
| 5.3      | Enthesis resident T cells are involved in enthesopathies provoking inflammation and bone remodeling — 85                                                              |
| 5.4      | Biomaterials and growth factor-dependent regeneration of tendon-to-bone junctions — 87                                                                                |
| 5.5      | Biomechanical stimulation for enthesis repair — 88                                                                                                                    |
| 5.6      | Mesenchymal stem cells (MSCs) — 88                                                                                                                                    |
| 5.7      | Stem cell-dependent approaches for repair of osteotendinous junctions — 89                                                                                            |
| 5.8      | Stem cell-dependent delivery of growth factors — 91                                                                                                                   |
| 5.9      | Stem cell-dependent delivery of tenogenic transcription factors — 93                                                                                                  |
| 5.10     | Stem cell-dependent delivery of matrix metalloproteinases — 94                                                                                                        |
| 5.11     | Trophic activities of MSCs in enthesis repair — 94                                                                                                                    |
| 5.12     | Outlook — 95                                                                                                                                                          |
|          | Acknowledgment — 96                                                                                                                                                   |
|          | References — 96                                                                                                                                                       |
| <b>6</b> | <b>Mesenchymal stem cells for clinical/therapeutic interventions of graft-versus-host disease — 101</b>                                                               |
| 6.1      | Clinical graft-versus-host disease — 101                                                                                                                              |
| 6.2      | Chronic graft-versus-host disease — 102                                                                                                                               |
| 6.3      | Rationale to use mesenchymal stromal cells for treatment of GvHD — 103                                                                                                |
| 6.4      | Experience of MSCs in clinical acute graft-versus-host disease — 105                                                                                                  |
| 6.5      | Treatment of acute GvHD with stromal cells from alternate sources, adipose tissue-derived, umbilical cord blood-derived or fetal membrane-derived stromal cells — 110 |
| 6.6      | Mesenchymal stromal cells for treatment of chronic graft-versus-host disease — 111                                                                                    |

|          |                                                                                                                                                    |
|----------|----------------------------------------------------------------------------------------------------------------------------------------------------|
| 6.7      | Clinical trials of prophylaxis with mesenchymal stromal cells for graft-versus-host disease — <b>113</b>                                           |
| 6.8      | Discussion on clinical use of mesenchymal stem cells — <b>115</b>                                                                                  |
| 6.9      | How should we best utilize MSC treatment of GvHD? — <b>116</b>                                                                                     |
|          | References — <b>119</b>                                                                                                                            |
| <b>7</b> | <b>Mesenchymal stem cells for graft-versus-host disease in experimental animal models — 125</b>                                                    |
| 7.1      | Introduction – Experimental models of graft-versus-host disease (GvHD) — <b>125</b>                                                                |
| 7.2      | Immunobiology of experimental GvHD — <b>127</b>                                                                                                    |
| 7.3      | Mesenchymal stromal cells in mice — <b>128</b>                                                                                                     |
| 7.4      | Mesenchymal stromal cells and mouse models of graft-versus-host disease — <b>130</b>                                                               |
|          | References — <b>136</b>                                                                                                                            |
| <b>8</b> | <b>Mesenchymal stem cells and organ transplantation: initial clinical results — 143</b>                                                            |
| 8.1      | Introduction — <b>143</b>                                                                                                                          |
| 8.2      | Rationale for the use of MSCs in organ transplantation — <b>144</b>                                                                                |
| 8.2.1    | Shortage of donor organs for transplantation — <b>144</b>                                                                                          |
| 8.2.2    | Ischemia-reperfusion injury — <b>145</b>                                                                                                           |
| 8.2.3    | Chronic immunosuppression — <b>145</b>                                                                                                             |
| 8.3      | Considerations regarding the choice of the clinical protocols — <b>146</b>                                                                         |
| 8.3.1    | Definition, identity and product release criteria for human MSCs preparations — <b>147</b>                                                         |
| 8.3.2    | Source of human MSCs — <b>147</b>                                                                                                                  |
| 8.3.3    | Potential interactions between MSCs and concomitant therapy — <b>149</b>                                                                           |
| 8.3.4    | Safety of MSCs-based treatments — <b>150</b>                                                                                                       |
| 8.4      | Clinical MSCs and solid organ transplantation trials — <b>151</b>                                                                                  |
| 8.4.1    | Autologous MSCs in the induction phase with standard immunosuppression — <b>151</b>                                                                |
| 8.4.2    | Autologous MSCs in the induction phase with avoidance of biologics at induction and reduced maintenance immunosuppression — <b>154</b>             |
| 8.4.3    | Allogeneic MSCs in the induction phase — <b>155</b>                                                                                                |
| 8.4.4    | Autologous MSCs for the treatment of biopsy-proven subclinical rejection, progressive renal interstitial fibrosis and tubular atrophy — <b>156</b> |
| 8.5      | Future perspectives — <b>158</b>                                                                                                                   |
|          | Acknowledgments: — <b>158</b>                                                                                                                      |
|          | References — <b>159</b>                                                                                                                            |

|           |                                                                                                                                            |
|-----------|--------------------------------------------------------------------------------------------------------------------------------------------|
| <b>9</b>  | <b>Stem cell therapy in patients with ischemic heart disease — 163</b>                                                                     |
| 9.1       | Introduction — 163                                                                                                                         |
| 9.2       | Cell type and source for clinical therapy — 165                                                                                            |
| 9.3       | Mechanisms behind regeneration of damaged myocardium — 166                                                                                 |
| 9.4       | Preclinical experience with stem cells for IHD — 169                                                                                       |
| 9.5       | Cell-based therapy in patients with IHD — 169                                                                                              |
| 9.6       | MSCs in patients with IHD — 171                                                                                                            |
| 9.7       | Ongoing clinical trials using MSCs — 174                                                                                                   |
| 9.8       | Cell delivery and engraftment — 174                                                                                                        |
| 9.9       | Perspectives — 178                                                                                                                         |
| 9.10      | Conclusion — 179                                                                                                                           |
|           | References — 179                                                                                                                           |
| <b>10</b> | <b>Mesenchymal stem cells as a strategy for the treatment of multiple sclerosis and other diseases of the central nervous system — 185</b> |
| 10.1      | Introduction — 185                                                                                                                         |
| 10.2      | MSCs transplantation for neurological diseases: why, which, and how — 186                                                                  |
| 10.3      | Vascular diseases: ischemic stroke — 187                                                                                                   |
| 10.3.1    | Preclinical studies — 187                                                                                                                  |
| 10.3.2    | Clinical studies — 189                                                                                                                     |
| 10.4      | Trauma spinal cord injury — 190                                                                                                            |
| 10.4.1    | Preclinical studies — 191                                                                                                                  |
| 10.4.2    | Clinical studies — 192                                                                                                                     |
| 10.5      | Extrapyramidal diseases — 192                                                                                                              |
| 10.5.1    | Parkinson's disease (PD) — 192                                                                                                             |
| 10.5.2    | Preclinical studies — 193                                                                                                                  |
| 10.5.3    | Clinical studies — 194                                                                                                                     |
| 10.5.4    | Huntington's disease (HD) — 194                                                                                                            |
| 10.5.5    | Preclinical studies — 195                                                                                                                  |
| 10.6      | Multiple system atrophy (MSA) — 196                                                                                                        |
| 10.6.1    | Preclinical studies — 196                                                                                                                  |
| 10.6.2    | Clinical studies — 197                                                                                                                     |
| 10.7      | CNS demyelinating diseases: multiple sclerosis — 197                                                                                       |
| 10.7.1    | Preclinical studies — 198                                                                                                                  |
| 10.7.2    | Clinical studies — 199                                                                                                                     |
| 10.8      | Motor neuron diseases: amyotrophic lateral sclerosis (ALS) — 200                                                                           |
| 10.8.1    | Preclinical studies — 200                                                                                                                  |
| 10.8.2    | Clinical studies — 201                                                                                                                     |
| 10.9      | Dementia: Alzheimer's disease (AD) — 202                                                                                                   |
| 10.9.1    | Preclinical studies — 202                                                                                                                  |

|           |                                                                                   |            |
|-----------|-----------------------------------------------------------------------------------|------------|
| 10.9.2    | Clinical studies —                                                                | 203        |
| 10.10     | Concluding remarks —                                                              | 203        |
|           | References —                                                                      | 204        |
| <b>11</b> | <b>Mesenchymal stem cells for the treatment of inflammatory bowel disease —</b>   | <b>211</b> |
| 11.1      | Introduction —                                                                    | 211        |
| 11.2      | Immunology and intestinal barrier function —                                      | 212        |
| 11.3      | Cell-based treatments for IBD —                                                   | 215        |
| 11.3.1    | Hematopoietic cell transplantation —                                              | 215        |
| 11.4      | T regulatory cells (Tregs) —                                                      | 216        |
| 11.5      | Mesenchymal stem cells (MSCs) —                                                   | 217        |
| 11.5.1    | Immunologic basis for MSCs and IBD —                                              | 217        |
| 11.6      | MSC homing and engraftment —                                                      | 219        |
| 11.7      | MSC clinical trials —                                                             | 222        |
| 11.8      | Summary and future directions —                                                   | 224        |
|           | References —                                                                      | 226        |
| <b>12</b> | <b>Mesenchymal stem cells in chronic lung diseases: COPD and lung fibrosis —</b>  | <b>233</b> |
| 12.1      | Introduction —                                                                    | 233        |
| 12.2      | Idiopathic pulmonary fibrosis —                                                   | 235        |
| 12.3      | MSCs and animal models of fibrotic lung disorders —                               | 238        |
| 12.4      | Chronic obstructive pulmonary disease (COPD) —                                    | 246        |
| 12.5      | Conclusions and future directions —                                               | 252        |
|           | Acknowledgments —                                                                 | 253        |
|           | References —                                                                      | 253        |
| <b>13</b> | <b>Mesenchymal stem cells as therapeutics for liver repair and regeneration —</b> | <b>263</b> |
| 13.1      | Introduction —                                                                    | 263        |
| 13.2      | Cell therapy for liver disease —                                                  | 264        |
| 13.3      | The ideal cell for liver regeneration —                                           | 265        |
| 13.4      | Mesenchymal stem cells (MSCs) as cellular therapeutics —                          | 266        |
| 13.5      | MSCs for treating liver disease —                                                 | 269        |
| 13.5.1    | In vitro models to study MSCs hepatic differentiation —                           | 269        |
| 13.5.2    | In vivo models to study MSCs as cellular therapies for liver disease/<br>injury — | 270        |
| 13.6      | The fetal sheep model —                                                           | 273        |
| 13.7      | Clinical trials using MSCs for liver regeneration —                               | 279        |
| 13.8      | Summary/Conclusions: —                                                            | 280        |
|           | References —                                                                      | 281        |

|           |                                                                                                                    |
|-----------|--------------------------------------------------------------------------------------------------------------------|
| <b>14</b> | <b>Mesenchymal stem cells attenuate renal fibrosis — 293</b>                                                       |
| 14.1      | Introduction – Kidney function — 293                                                                               |
| 14.2      | Kidney dysfunction and chronic kidney disease (CDK) — 295                                                          |
| 14.2.1    | Molecular and cellular interaction in renal fibrosis — 296                                                         |
| 14.3      | Mesenchymal stem cells (MSCs): Definition and basic features — 298                                                 |
| 14.3.1    | Therapeutic potential of MSCs and their mechanisms of action in the repair/<br>regeneration of tissue injury — 298 |
| 14.4      | MSCs and kidney diseases — 301                                                                                     |
| 14.4.1    | MSCs have a prominent antifibrotic effect in distinct models of experimental<br>chronic kidney diseases — 301      |
| 14.4.2    | Mechanisms related to MSCs prevent renal fibrosis — 303                                                            |
| 14.5      | Final considerations — 304                                                                                         |
|           | References — 305                                                                                                   |
| <b>15</b> | <b>Immunomodulation by mesenchymal stem cells – a potential therapeutic<br/>strategy for type 1 diabetes — 309</b> |
| 15.1      | Introduction — 309                                                                                                 |
| 15.2      | Mechanisms of immunomodulation — 310                                                                               |
| 15.3      | MSC therapy for type 1 diabetes (T1D) — 311                                                                        |
| 15.3.1    | Why does MSC therapy hold value in T1D? — 311                                                                      |
| 15.3.2    | Preclinical studies to prevent and reverse T1D — 312                                                               |
| 15.3.3    | MSC implications in islet cell transplantation — 313                                                               |
| 15.3.4    | MSCs and clinical trials for T1D — 314                                                                             |
| 15.4      | Safety of MSC therapy — 315                                                                                        |
|           | References: — 315                                                                                                  |
| <b>16</b> | <b>Fibrogenic potential of human multipotent mesenchymal stem cells in<br/>inflammatory environments — 319</b>     |
| 16.1      | Introduction — 319                                                                                                 |
| 16.2      | Fibrogenic potential in <i>ex vivo</i> expanded MSCs — 320                                                         |
| 16.3      | Evidence of MSCs infiltration into tumor stroma — 321                                                              |
| 16.4      | Controversies regarding therapeutic benefits of bone marrow-derived MSCs<br>in liver fibrosis — 322                |
| 16.5      | Limited contribution of MSCs to liver regeneration in acute liver<br>injury — 324                                  |
| 16.6      | Conclusion — 326                                                                                                   |
|           | References — 326                                                                                                   |

|           |                                                                                               |
|-----------|-----------------------------------------------------------------------------------------------|
| <b>17</b> | <b>Mesenchymal stem cells and the tumor microenvironment — 331</b>                            |
| 17.1      | Introduction — 331                                                                            |
| 17.2      | The tumor microenvironment and its role in cancer initiation and progression — 333            |
| 17.3      | How do we define MSCs in cancer? — 334                                                        |
| 17.4      | What are the roles of MSCs in cancer progression? — 335                                       |
| 17.4.1    | Effect of MSCs on tumor cell proliferation — 337                                              |
| 17.4.2    | MSCs promote survival — 337                                                                   |
| 17.4.3    | MSCs are proangiogenic — 338                                                                  |
| 17.4.4    | MSCs have an immunosuppressive function — 338                                                 |
| 17.4.5    | MSCs promote epithelial to mesenchymal transition — 339                                       |
| 17.5      | How do tumor cells communicate with MSCs? — 341                                               |
| 17.6      | Are MSCs recruited by tumor cells? — 343                                                      |
| 17.7      | Can we target MSCs in human cancer? — 345                                                     |
| 17.8      | Conclusion — 346                                                                              |
|           | References — 346                                                                              |
| <br>      |                                                                                               |
| <b>18</b> | <b>Mesenchymal stem cells as a carrier for tumor-targeting therapeutics — 353</b>             |
| 18.1      | Introduction — 353                                                                            |
| 18.2      | Enhanced angiogenesis as a target for tumor therapy — 354                                     |
| 18.3      | Why current therapies are not effective enough — 355                                          |
| 18.3.1    | Shortcomings of current anti-angiogenic pharmaceuticals — 356                                 |
| 18.4      | Why mesenchymal stem cells would be useful for tumor targeting — 358                          |
| 18.4.1    | The tumor-homing properties of MSCs — 358                                                     |
| 18.4.2    | MSCs as a diagnostic tool — 361                                                               |
| 18.4.3    | Antitumor effects of unmanipulated MSCs — 361                                                 |
| 18.4.4    | Vesicular communication of MSCs: How MSCs can be used as a drug-delivery vehicle — 362        |
| 18.5      | MSCs as a gene product-delivering vehicle — 364                                               |
| 18.5.1    | Genetically modified MSCs for therapeutic delivery — 364                                      |
| 18.5.2    | Potential for MSCs-delivered anti-angiogenic therapies — 365                                  |
| 18.5.3    | MSCs-mediated tumor-homing of oncolytic adenovirus enhances tumor therapy — 366               |
| 18.5.4    | Delivery of TRAIL by genetically modified MSCs to induce apoptosis — 367                      |
| 18.5.5    | Tumor-specific promoter-driving thymidine kinase (TK) expression for prodrug conversion — 367 |
| 18.6      | Methods of therapeutic MSCs administration — 369                                              |
| 18.7      | The advantage of MSCs being immunoprivileged — 370                                            |
| 18.8      | Sources of acquiring MSCs for tumor therapy — 371                                             |

|              |                                                                             |            |
|--------------|-----------------------------------------------------------------------------|------------|
| 18.9         | Remaining challenges for the use of MSCs to deliver therapeutics —          | <b>372</b> |
| 18.9.1       | The immunoprivileged nature of MSCs —                                       | <b>372</b> |
| 18.9.2       | Varying responses to MSCs depending on cancer type, injection site, etc. —  | <b>372</b> |
| 18.9.3       | Changes in MSCs induced by cancer cells within the tumor microenvironment — | <b>373</b> |
| 18.10        | Summary and prospective —                                                   | <b>375</b> |
|              | Acknowledgments —                                                           | <b>375</b> |
|              | References —                                                                | <b>376</b> |
| <b>19</b>    | <b>Systems biology approach to stem cells, tissues and inflammation —</b>   | <b>381</b> |
| 19.1         | Introduction —                                                              | <b>381</b> |
| 19.2         | Biological aspects —                                                        | <b>382</b> |
| 19.2.1       | Cells are the regulatory units —                                            | <b>382</b> |
| 19.2.2       | Influence of cell number and phenotype —                                    | <b>383</b> |
| 19.3         | Technological aspects —                                                     | <b>383</b> |
| 19.3.1       | Technology and type of molecules —                                          | <b>383</b> |
| 19.3.2       | When “pictures start moving” —                                              | <b>384</b> |
| 19.4         | Mathematical aspects —                                                      | <b>385</b> |
| 19.4.1       | Comparative statistics and interpretation —                                 | <b>385</b> |
| 19.4.2       | Interpretation based on pre-existing knowledge —                            | <b>386</b> |
| 19.4.3       | Network models —                                                            | <b>386</b> |
| 19.5         | Systems biology of differentiation —                                        | <b>388</b> |
| 19.6         | Important tasks —                                                           | <b>389</b> |
| 19.7         | Conclusion —                                                                | <b>390</b> |
|              | References —                                                                | <b>391</b> |
| <b>Index</b> | <b>—</b>                                                                    | <b>395</b> |
